# Supplementary material for: Daily Life Patterns, Psychophysical Conditions, and Immunity of Adolescents in the COVID-19 Era: A Mixed Research with Qualitative Interviews by a Quasi-Experimental Retrospective Study
Source: MDPI journal article supplement (doi:10.3390/healthcare10061152), 2022-06-20
Supplement: s1 [file s1]

# Supplementary Materials

**Table S1.** Questionnaire components of daily life pattern.

| Questions |                                                                     | Answers                                                                                                                                                                            | Related Variables |
|-----------|---------------------------------------------------------------------|------------------------------------------------------------------------------------------------------------------------------------------------------------------------------------|-------------------|
| Q1        | How healthy do you think you are?                                   | 1. I consider myself very unhealthy.<br>2. I consider myself unhealthy.<br>3. I think my health is average.<br>4. I consider myself healthy.<br>5. I consider myself very healthy. | Health            |
| Q2        | Are you prone to respiratory diseases such as colds?                | 1. I always get colds.<br>2. I am prone to colds.<br>3. I have average proneness to colds.<br>4. I am not prone to colds.<br>5. I never get colds.                                 |                   |
| Q3        | How many hours per day do you sleep on average?                     | 1. Less than 5 hours<br>2. Between 5~6 hours<br>3. Between 6~7 hours<br>4. Between 7~8 hours<br>5. More than 8 hours                                                               | Sleep             |
| Q4        | What time do you usually sleep?                                     | 1. Before 21 o'clock<br>2. 21~22 o'clock<br>3. 22~23 o'clock<br>4. 23~24 o'clock<br>5. After 24 o'clock                                                                            |                   |
| Q5        | What time do you usually wake up?                                   | 1. Before 4 o'clock<br>2. 4~5 o'clock<br>3. 5~6 o'clock<br>4. 6~7 o'clock<br>5. 7~8 o'clock<br>6. After 8 o'clock                                                                  |                   |
| Q6        | How many meals do you eat per day?                                  | 1. One time<br>2. Two times<br>3. Three times<br>4. Four or more times                                                                                                             | Diet              |
| Q7        | How many days a week do you exercise for at least 30 minutes a day? | 1. None<br>2. One day<br>3. Two days<br>4. Three days<br>5. More than four days                                                                                                    | Exercise          |

**Table S2.** Comparative results of CES-D among the four groups.

|          | Groups      |             |             |             | F      | <i>p</i> | $\eta^2$ |
|----------|-------------|-------------|-------------|-------------|--------|----------|----------|
|          | NDG         | LDG         | MDG         | HDG         |        |          |          |
| CES-D 1  | 0.51 ± 0.73 | 1.04 ± 1.15 | 1.33 ± 0.90 | 2.50 ± 0.76 | 15.075 | 0.001    | 0.288    |
| CES-D 2  | 0.30 ± 0.72 | 0.43 ± 0.73 | 0.33 ± 0.82 | 0.75 ± 1.04 | 0.850  | 0.469    | 0.022    |
| CES-D 3  | 0.08 ± 0.33 | 0.48 ± 0.67 | 0.73 ± 0.88 | 1.88 ± 1.36 | 22.846 | 0.001    | 0.380    |
| CES-D 4  | 2.37 ± 1.03 | 2.13 ± 1.06 | 2.20 ± 0.86 | 1.00 ± 1.07 | 3.979  | 0.010    | 0.096    |
| CES-D 5  | 0.52 ± 0.83 | 0.83 ± 0.78 | 0.87 ± 0.92 | 1.88 ± 0.99 | 6.450  | 0.001    | 0.147    |
| CES-D 6  | 0.00 ± 0.00 | 1.00 ± 0.00 | 2.00 ± 0.00 | 3.00 ± 0.00 | 7.898  | 0.000    | 1.000    |
| CES-D 7  | 0.87 ± 0.92 | 0.87 ± 0.81 | 0.93 ± 0.88 | 1.50 ± 1.20 | 1.400  | 0.247    | 0.036    |
| CES-D 8  | 1.97 ± 0.99 | 2.09 ± 1.00 | 2.07 ± 0.88 | 2.13 ± 0.99 | 0.287  | 0.834    | 0.008    |
| CES-D 9  | 0.27 ± 0.63 | 0.43 ± 0.59 | 0.27 ± 0.46 | 1.75 ± 1.28 | 11.407 | 0.001    | 0.234    |
| CES-D 10 | 0.15 ± 0.47 | 0.65 ± 0.71 | 1.13 ± 1.13 | 2.00 ± 1.20 | 22.237 | 0.001    | 0.373    |
| CES-D 11 | 0.32 ± 0.60 | 0.48 ± 0.73 | 0.80 ± 1.15 | 1.13 ± 1.36 | 3.519  | 0.017    | 0.086    |
| CES-D 12 | 0.94 ± 0.97 | 1.04 ± 0.77 | 1.20 ± 0.77 | 1.88 ± 0.99 | 2.845  | 0.041    | 0.071    |
| CES-D 13 | 0.20 ± 0.52 | 0.35 ± 0.65 | 0.87 ± 0.99 | 1.63 ± 1.30 | 12.174 | 0.001    | 0.246    |
| CES-D 14 | 0.21 ± 0.50 | 0.74 ± 1.05 | 1.20 ± 1.01 | 1.63 ± 1.41 | 12.944 | 0.001    | 0.257    |
| CES-D 15 | 0.13 ± 0.38 | 0.30 ± 0.47 | 0.40 ± 0.74 | 1.00 ± 1.31 | 6.036  | 0.001    | 0.139    |
| CES-D 16 | 1.27 ± 1.07 | 1.30 ± 0.70 | 1.67 ± 0.98 | 1.00 ± 1.20 | 0.920  | 0.434    | 0.024    |
| CES-D 17 | 0.14 ± 0.49 | 0.48 ± 0.79 | 0.27 ± 0.59 | 1.50 ± 1.20 | 10.314 | 0.001    | 0.216    |
| CES-D 18 | 0.10 ± 0.34 | 0.52 ± 0.90 | 0.60 ± 0.63 | 1.63 ± 1.30 | 15.652 | 0.001    | 0.295    |
| CES-D 19 | 0.14 ± 0.35 | 0.30 ± 0.56 | 0.33 ± 0.62 | 1.13 ± 1.36 | 6.794  | 0.001    | 0.154    |
| CES-D 20 | 0.32 ± 0.73 | 0.70 ± 0.82 | 0.73 ± 0.96 | 1.63 ± 1.06 | 6.773  | 0.001    | 0.154    |

All data represents mean ± standard deviation. Symbols <sup>a</sup>, <sup>b</sup>, <sup>c</sup>, and <sup>d</sup> represent post hoc results from Bonferroni test. NDG, no-depression group; LDG, low-depression group; MDG, moderate-depression group; HDG, high-depression group.
